# Supplementary material
Source: publisher figshare collection journal article supplement (https://acs.figshare.com/ndownloader/files/5193991)

# **\ Ethylene Homopolymerization and Copolymerization with Functionalized 5-**

## **Norbornen-2-yl Monomers by a Novel Nickel Catalyst System**

Steve J. Diamanti,<sup>†</sup> Prasenjit Ghosh,<sup>†</sup> Fumihiko Shimizu,<sup>‡</sup> and Guillermo C. Bazan<sup>\*†</sup>

<sup>†</sup>Institute for Polymer and Organic Solids, Departments of Chemistry and Materials,

University of California, Santa Barbara, CA 93106, U.S.A.

<sup>‡</sup>Mitsubishi Chemical Corporation, Science and Technology Research Center 1000

Kamoshida-cho, Aoba-ku, Yokohama 227-8502, Japan

### **Supplementary Information**

NMR spectra were obtained using a Varian Unity 500 MHz spectrometer. <sup>1</sup>H and <sup>13</sup>C

NMR spectra of the polymers were obtained in mixed solvent (C<sub>6</sub>D<sub>6</sub>/1,2,4-

trichlorobenzene 1:4 ratio in volume) at 115 °C.

<sup>13</sup>C-NMR of an ethylene homopolymer.

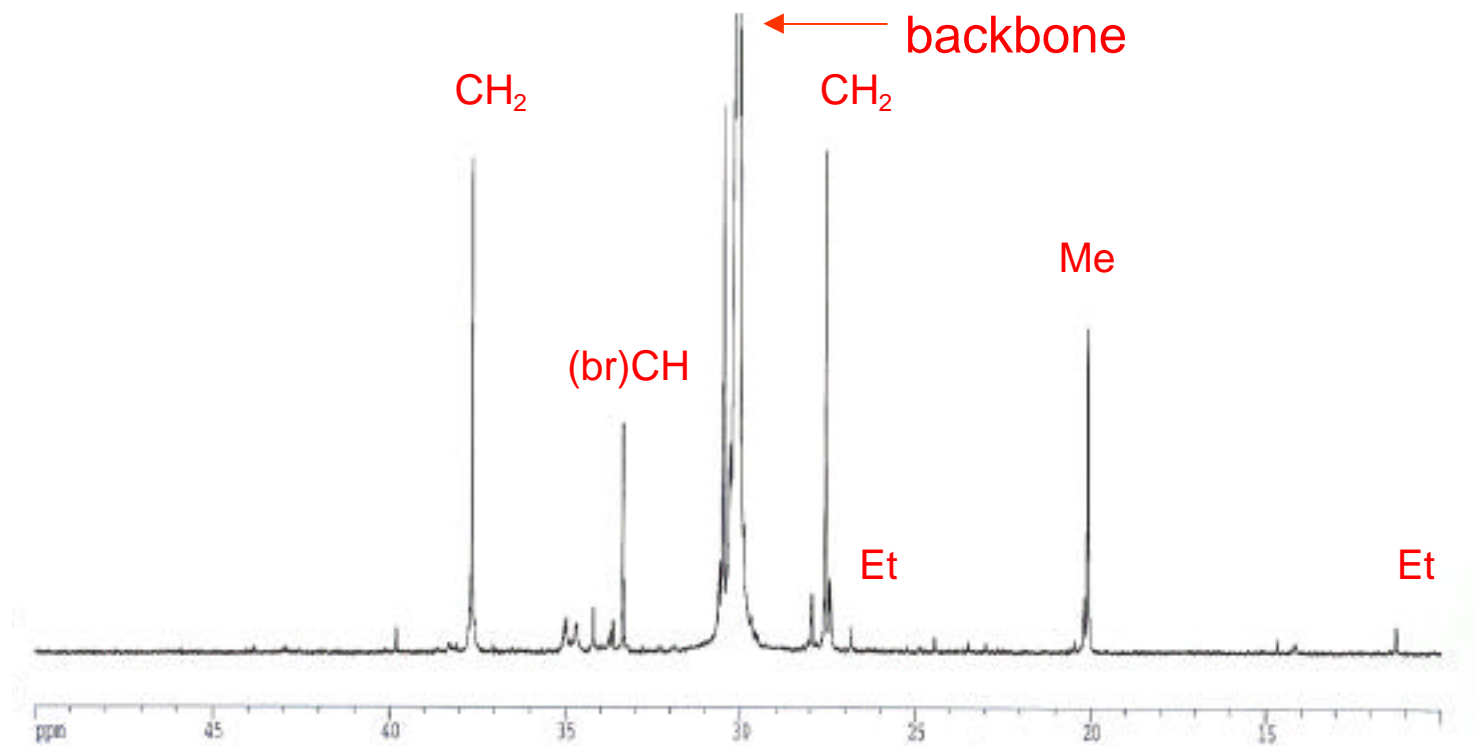

$^{13}\text{C}$  -NMR of a copolymer of ethylene and **4**.

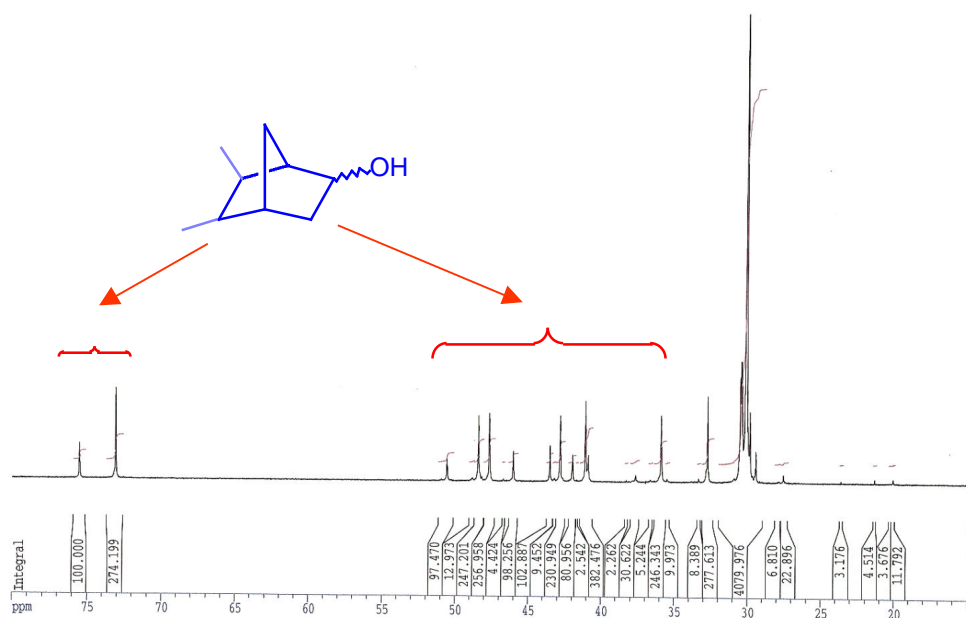

$^1\text{H}$  -NMR of a copolymer of ethylene and **3**.

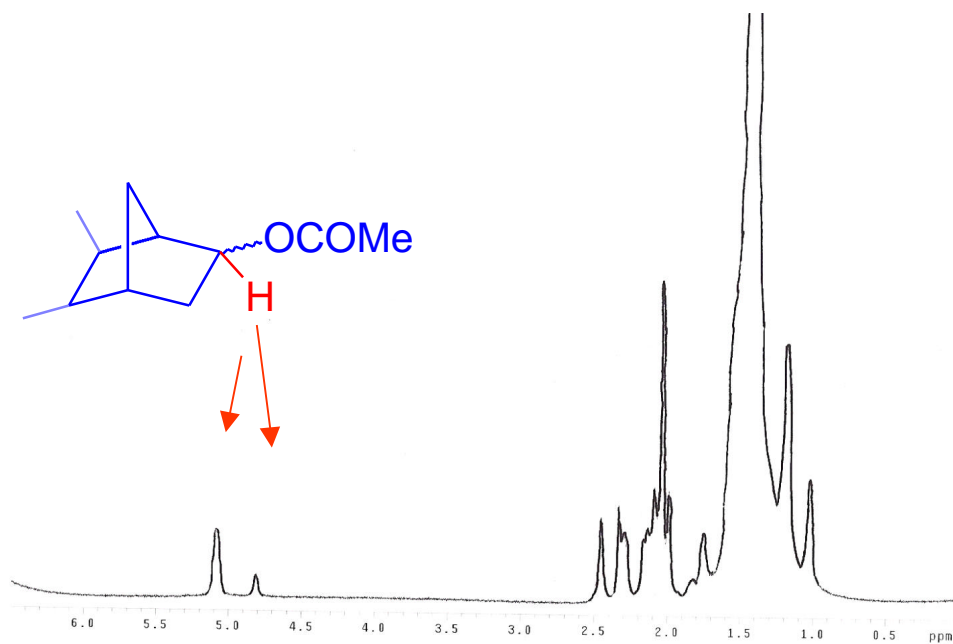

Supplement: Supplementary file 1 [file 5193991]
